# Supplementary material for: Oxidative Stress Measurement in Frozen/Thawed Human Sperm: The Protective Role of an In Vitro Treatment with Myo-Inositol
Source: MDPI journal article supplement (doi:10.3390/antiox11010010), 2021-12-22
Supplement: s1 [file s1]

**Table S1:** Main sperm parameters, in basal (fresh) or in cryopreserved sperm without myo-inositol treatment (NT), in sperm treated with myo-inositol before cryopreservation (Pre-T) and in sperm treated with myo-inositol after cryopreservation (Post-T).

|                                                          | Fresh |      | NT   |     | Pre-T |     | Post-T |     |
|----------------------------------------------------------|-------|------|------|-----|-------|-----|--------|-----|
|                                                          | mean  | sd   | mean | sd  | mean  | sd  | mean   | sd  |
| <b>Sperm number (<math>\times 10^6/\text{mL}</math>)</b> | 196.0 | 27.5 | 43.5 | 4.6 | 43.7  | 4.8 | 44.2   | 4.6 |
| <b>sperm motility</b>                                    | 63.7  | 3.0  | 27.0 | 1.5 | 27.6  | 1.6 | 28.5   | 1.8 |
| <b>sperm vitality</b>                                    | 78.8  | 3.1  | 46.9 | 1.1 | 47.7  | 1.4 | 48.5   | 1.1 |
